# Supplementary material
Source: publisher figshare collection journal article supplement (https://acs.figshare.com/ndownloader/files/9790576)
Supplement: Supplementary file 1 [file 9790576]

## Sheet: Hoja1
Table S2: Forward and reverse primers used for qPCR of selected targets
mRNA	Foward primer	Reverse primer
CEBPB	cgcttacctcggctacca	acgaggaggacgtggagag
SFPQ	gaggagaagatctcggactcg	cgacatcgctgtgtgtaagttt
SRSF3	gcagtccgagagctagatgg	ttcaccattcgacagttcca
TCF7L2	aagaggaaaagggacaagcag	aggagcgctcaggtctgtaa
MAFG	gtggacaggaagcagctca	tattgggggtcgtcataacc
TFE3	cagcgctccaaagacctg	ctgggcctgcagttctagtt
FOSL2	acgccgagtcctactcca	tgagccaggcatatctaccc
YBX1	ggagggtgctgacaacca	gctgtctttggcgaggag
RNA 18s	gctctagaattaccacagttatccaa	aaatcagttatggttcctttggtc
